# Supplementary material
Source: PubMed Central journal article supplement (PMC3093486)
Supplement: 1105195108_pnas.201105195SI.pdf [file 1105195108_pnas.201105195SI.pdf]

# Supporting Information

Benoit et al. 10.1073/pnas.1105195108

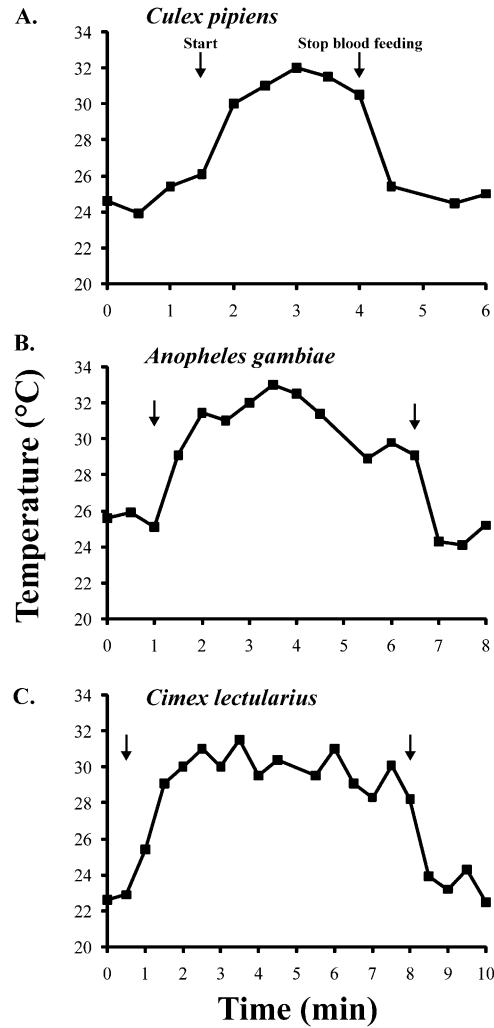

**Fig. S1.** Changes in body temperature in response to blood feeding in (A) adult females of the northern house mosquito, *C. pipiens*; (B) the malaria mosquito, *A. gambiae*; and (C) the bed bug, *C. lectularius*. Profiles are presented for one representative individual of each species; similar temperature changes were recorded for 10 individuals of each species.
